# Supplementary material
Source: publisher site journal article supplement (https://www.spandidos-publications.com/5232/downloadSupplementary)
Supplement: Supplementary file 1 [file downloadSupplementary]

## Sheet: Table SI
Table SI. List of endogenous peptides identified in urine samples from patients with PCa, BPH and healthy controls.
Peptide sequence	Mass	m/z	Retention time	Protein name	Gene name	Start aa	Stop aa	Peptide ID	Average log2 peak area in PCa group	Average log2 peak area in BPH group	Average log2 peak area in control group
DQSRVLNLGPITR	1468.82	734.918	13.09	Uromodulin	UMOD	593	606	UMOD-P1	18.5304	19.5837	19.9583
IDQSRVLNLGPITR	1581.91	791.46	13.0908	Uromodulin	UMOD	592	606	UMOD-P2	19.1939	20.2558	20.2608
QSRVLNLGPITR	1353.8	677.403	13.0904	Uromodulin	UMOD	594	606	UMOD-P3	15.5183	16.5199	16.7724
SGSVIDQSRVLNLGPITR	1912.07	638.027	13.0833	Uromodulin	UMOD	588	606	UMOD-P4	24.0596	25.2272	24.7508
SGSVIDQSRVLNLGPITRK	2040.15	510.794	11.6802	Uromodulin	UMOD	588	607	UMOD-P5	18.6092	19.6878	19.8366
SVIDQSRVLNLGPITR	1768.02	590.009	13.1246	Uromodulin	UMOD	590	606	UMOD-P6	20.6263	21.083	20.9105
VIDQSRVLNLGPITR	1680.97	560.996	11.8907	Uromodulin	UMOD	591	606	UMOD-P7	21.2686	21.6982	21.3448
SGSVIDQSRVLNLGPI	1654.91	827.963	15.8515	Uromodulin	UMOD	588	604	UMOD-P8	n.a.	n.a.	n.a.
SGSVIDQSRVLNLGPIT	1755.96	878.483	14.8446	Uromodulin	UMOD	588	605	UMOD-P9	n.a.	n.a.	n.a.
VIDQSRVLNLGPITRK	1809.07	453.023	10.3399	Uromodulin	UMOD	591	607	UMOD-P10	n.a.	n.a.	n.a.
EAIPMSIPPEVKFNKPF	1944.03	654.013	14.057	Alpha-1-antitrypsin	SERPINA	377	394	SERPINA-P1	n.a.	n.a.	n.a.
EAIPMSIPPEVKFNKPFV	2043.1	681.706	16.813	Alpha-1-antitrypsin	SERPINA	377	395	SERPINA-P2	n.a.	n.a.	n.a.
EDPQGDAAQKTDTSHHDQDHPTFNKITPNLAEFA	3775.72	755.95	12.3342	Alpha-1-antitrypsin	SERPINA	24	58	SERPINA-P3	n.a.	n.a.	n.a.
EDPQGDAAQKTDTSHHDQDHPTFNKITPNLAEFAFS	4009.83	802.772	14.6169	Alpha-1-antitrypsin	SERPINA	24	60	SERPINA-P4	n.a.	n.a.	n.a.
EQNTKSPLFMGKVVNPTQK	2146.13	716.047	12.5025	Alpha-1-antitrypsin	SERPINA	399	418	SERPINA-P5	n.a.	n.a.	n.a.
IEQNTKSPLFMGKVVNPTQK	2259.22	753.743	12.5021	Alpha-1-antitrypsin	SERPINA	398	418	SERPINA-P6	n.a.	n.a.	n.a.
LMIEQNTKSPLFMGKVVNPTQK	2503.36	626.594	12.5039	Alpha-1-antitrypsin	SERPINA	396	418	SERPINA-P7	n.a.	n.a.	n.a.
MIEQNTKSPLFMGKVVNPTQK	2390.26	797.423	12.5016	Alpha-1-antitrypsin	SERPINA	397	418	SERPINA-P8	n.a.	n.a.	n.a.
SPLFMGKVVNPTQK	1545.84	773.422	10.7233	Alpha-1-antitrypsin	SERPINA	404	418	SERPINA-P9	n.a.	n.a.	n.a.
The peptides that were submitted to comparative quantitative analyzes between the study groups are highlighted. n.a., not applicable.
